# Supplementary material for: Characterization and Identification of Drought-Responsive ABA-Aldehyde Oxidase (AAO) Genes in Potato (Solanum tuberosum L.)
Source: MDPI journal article supplement (doi:10.3390/plants12223809), 2023-11-09
Supplement: s1 [file s1]

**Table S3** The sequences used to construct phylogenetic tree.

>OsAAO1

MRLSSLLFLVCFFTVAMSQCAAAAKARHFRWEVSNMFWSPDCEEKVVIGINGQFPGP TIRAKAGDTIVVHLK  
NGLHTEGVVIHWHGIRQIGTPWADGTASISQCAINPEETFTYRFVVDKPGTYFYHGHYGMQRAAGLYGSLIVD  
VADGDEEPFKYDGEINLLSDWYHESIYTMVGLSSNPFRWIGEPQSLLINGRGQFNCSLAAAHTPGAKQCAA  
AGNRHCAPVILPVLPNKTYRLRVASTTSLASLNLAVGNHKLTVVEADGNYVEPFAVDDIDIYSGDSYSVLLTDDQ  
DTSANYWVSVGVRGRQPRTPALAVLNYPNRSRLPAAAPPATPAWDDFARSKAFTYRILGRAGVTPPPPAT  
DRRIELLNTQNRMGGGHVKWSINNVSMVLPATPYLGS LKMGLRSALPSAARPSDTFGRGYDVMRPPANPNTT  
VGDNVYVLAHNATVDVVLQANALARNVSEVHPWHLHGHDFWVLGYGDGAFRGDAGDAAALNLRNPPLR  
NTAVIFPYGWTAIRFVADNPGVWAFHCHIEPHLMGMGVIFAEAVDRVSELKAAVSCGATATLMAGAGGH  
V\*

>OsAAO2

MAAAVQLLVAAAAAAMAAACCAGMAAAAATVEVTWDVEYVLWAPDCQQRMIGINGRFPGNITARAGD  
VISVTMNNKMHTEGVVIHWHGIRQFGTPWADGTASISQCAVNPGETFVYKFVADKPGTYFYHGHFGMQRA  
AGLYGSLIVLDSPEQPEPFRHQYDDGGELPMMLSDWVHQNVAQAAGLDGKDRHFEWIGEPQTILINGRG  
QFECTLGPARKSFEKLLNENVETCVDDQKMCSDQEKLLRSECGPYCPRSQCAPVVFNVEQGKTYRLRIASTTS  
LSLLNVKIQGHKMTVVEADGNHVEPFFVDDIDIYSGESYSVLLKADQKPASYWISVGVGRGRHPKTPALAILSYG  
NGNAAPPPLQLPAGEPPVTPAWNDTQRSKAFTYSIRARKDTNRPPAAADRQIVLLNTQNLMDGRYRWSINN  
VSLTLPATPYLGAFHHGLQDSAFDASGEPPAAFPEDYDVMRPPANNATTASDRVFRLRHGGVVDVVLQANM  
LREEVSETHPWHLHGHDFWVLGYGDGRYDPAHAAGLNAADPPLRNTAVVPHGWTALRFVANNTGAWAF  
HCHIEPHLMGMGVVFEGEDRMHELD VPKDAMACGLVARTATPLTPATPLPPSPAPAP\*

>OsAAO3

MAPPPAAAAAALACILAVAATLAGADDPYRFFTWNVTYGSINPLGSTPQQGILINGQFPGPRI DCVTNDNIIVN  
VFNNLDEPFLLTWNGIKQRKNSWQDGLGTNCPIPPGANITYKFQAKDQIGTFVYFPSVAMHRAAGGFGAL  
NVYQRPAPVPPYPAGDFTLLVGDWYKAGHKQLRQALDAGGGGALPPPDALLINGMP SAAAFVGDQGRTYL  
FRVSNVGVKTSVNVRIQGHSLRLVEVEGTHPVQNVYDSL DVHVGQSVAFVLTLDKAAQDYAVVASARFSPGAS  
PLMATGTLHYSSAVSRAPGLPAPPPEQAEWSMNQARSFRWNLTASAARNPNPQGSFHYGTIATSRTLVLANS  
PVLQAGRRYAVNGVSFVVPDTPKLVDNYNIANVIGWDSVPARPDGAAPRSGTPVVRNLHEFIEVV FQNTEN  
ELQSWHLGDGYDFWVVG YNGQWTENQRTTYNLVDAQARHTVQVYPNGWSAILVSLDNQGMWNLRSAN  
WDRQYLGQQLYMRVWTPQQSFSNEYSIPTNAILCGRA AGLGH\*

>OsAAO4

MMRCSRLLCSLFLAAALFGVAAAATRRHDWDISYQFTSPDCVRKLAVTINGHTPGPTIRAVQGD TIVVNVKN  
SLLTENVAIHWHGIRQIGTPWADGTGVTQCPIPGDTFAYTFVVD RPGTYMYHAHYGMQRSAGLNGMIVVE  
VAPGAAGDGEREPFRYDGEHTVLLNDWVHRSTYEQAAGLASVPMVWVGEPQSLLINGRGRFVNCSSSPATA  
ASCNVSHPDCAVFAVVP GKTYRFRVASVTSLSALNFEIEGHEMTVVEADGHYVKPFVKNLNIYSGETYSVLI  
TADQDPNRNYWLASNVSRKPATPTGTAVLAYYGRRNSPRARPPTPPPAGPAWNDTAYRVRQSLATVAHPA  
HAVPPPPTSDRTILLNTQNKIGGQIKWALNNVSFTLPHTPYLVAMKRGLLGAFDQRPPPETYAGAAAFDVYAV  
QGNPNATTSDAPYRLRFGSVVDVVLQANMLAANSSETHPWHLHGHDFWVLGHGAGRFPDPAVHPAAYNLR  
DPIMKNTVAVHPFGWTALRFRADNPGVWAFHCHIEAHFFMGMGIVFEEGVERVGELPPEIMGCGKTRGGH\*

>OsAAO5

MRTWRLAVLACLCAAAAAAPAEAKTHHHTWNITYQYKSPDCFRKLAVTINGESPGPTIRAAQGDTLVVTVHN  
MLDTENTAIHWHGIRQIGSPWADGTAGVTQCPILPGETFTYRFVVDPRPGTYMYHAHYGMQRVAGLDGMLV  
SVPDGVAEFPAYDGEHTVLLMDWWHQSVYEQAVGLASVPMVVFVGEPQSLINGRGVFNCSPPAASNGGGA  
ACNAFGGECGWPTLFTASPGKTYRLRIGSLTSLASLSFEIEGHTMTVVEADGYVTPVVVKNLFIYSGETYSVLVT  
ADQDPSRSYWAASHVVS RDPTKTAPGRAVVRYASAAVDHPRTPPPTGPRWNDTASRVAQSR SFAALPGHVE  
PPPARPDRVLLLLNTQSKIDNHTKWAINGVSLSPATPYLVAMKHGLRGEFDQRPPPD SYDHGSLNLSSPPASLA  
VRHAAYRLALGSVVDVVLQNTAIPPPNGRSETHPWHLHGHD FVWLGYGEGKFVPEVDGPGLNAASARGGAV  
MKNTVALHPMGWTAVRFRASNPGVWLFHCHLEAH VYMGMGVVFEEGVDVLPRLPASIMGCGRTKGHHY\*

>AtAAO1

MMRPKRSSDTVHVFNLMVLCFIALFFSSVLCQGKIRRFKWEVKYEFKSPDCFEKLVITINGKFPGPTIKAQQGDT  
IVVELKNSFMTENVAVHWHGIRQIGTPWFDGVEGVTQCPILPGEVFIYQFVVDPRPGTYMYHSHYGMQRESGL  
IGMIQVSPPEPEPFTYDYDRNFLTDWYHKSMSEKATGLASIPFKWVGEPQSLMIQGRGRFNCSNNLTTPPS  
LVSGVCNVS NADCSR FILTVIPGKTYRLRIGSLTALSALSFQIEGHNLT VVEADGHYVEPFTVKNLFVYSGETYSVLL  
KADQNPRRNYWITSSIVSRPATTPATAVLNYYPNHPRRRPPTSESSNIVPEWNDTRSRLAQSLAIKARRGFIHAL  
PENSDKIVILLNTQNEVNGYRRWSVNNVSYHHPKTPYLIALKQNL TNAFDWRTAPENYDSRNYDIFAKPLNA  
NATTS DGIYRLRFNSTVDVILQNANTMNANNSETHPWHLHGHD FVWLGYGEGKFNESEDPKRYNRVDPIKK  
NTVAVQPFGW TALRFRADNPGVWSFHCHIESHFFMGMGIVFESGIDKVSSLPSSIMGCGQTKR

>AtAAO2

MAVIVWWLLTVVVVAFHSASAAVVESTWEVEYKYWWPDCKEGIVMAINGQFPGPTIDAVAGDTVIIHVVNKL  
STEGVVIHWHGIRQKGT PWADGAAGVTQCPINPGETFTYKFIVDKAGTHFYHGHYGMQRSSGLYGM LIVRSP  
KERLIYDGEFNLLSDWWHQSIHAQELALSSRPMRWIGEPQSLINGRGQFNCSQAAYFNKGGEKDVCTFKEN  
DQCAPQTLRVEPNRVYRLRIASTTALASNLAVQGHQLV VVEADGNYVAPFTVNDIDVYSGETYSVLLKTNALPS  
KKYWISVGVRGREPKTPQALTVINYVDATESRPSHPPVTPIWNDTDRSKSF SKIFAAGKYPKPPEKSHDQLILL  
NTQNL YEDYTKWSINNVSLSVPVTPYLGSI RYGLKSAYDLKSPAKKLIMDNYDIMKPPPNPNTTKGSGIYNFAFGI  
VVDVILQANANVLKG VISEIHPWHI HGHD FVWLGYGEGKF KPGIDEKTFNLKNPPLRNTVVL YPFGWTAIRFVTD  
NPGVWFFHCHIEPHLMGMGVVFVEGVDRIGKMEIPDEALGCGLTRKWL MNRGRP

>AtAAO3

MSYDEHTSSSFYISQMGVWWIVLVAVLTHTASAAVREYHWEVEYKYWSPDCKEGAVMTVNGEFPGPTIKA  
FAGDTVVNLTNKL TTEGLVIHWHGIRQFGSPWADGAAGVTQCAINPGETFTYNFTVEKPGTHFYHGHYGMQ  
RSAGLYGSLIVDAKGKSERLRYDGEFNLLSDWWHEAIPSQELGLSSKPMRWIGEAQSILINGRGQFNCSLAA  
QFSNNTSLPMCTFKEGDQCAPQILHVEPNKTYRIRLSSTTALASNLAVQGHKL VVVEADGNYITPFTDDIDIYS  
GESYSVLLTTDQDPSQNYYSVGVRGRKPNTTQALTILNYVTAPASKLPSSPPVTPRWDDFERSKNFSKKIFSAM  
GSPSPPKYRKRLILLNTQNLIDGYTKWAINNVSLVTPATPYLGSVKYNLKLGFNRKSPPRSYRMDYDIMNPPFP  
NTTTGNGIYVFPFNVTVDVIIQANANVLKG VISEIHPWHLHGHD FVWLGYGDGKF KPGIDEKTYNLKNPPLRNTA  
ILYPYGWTAIRFVTDNPGVWFFHCHIEPHLMGMGVVFAEGLNRIGKVPDEALGCGLTKQFLMNRNRN

>NtAAO1

MASLGFLFFLLPLILLELSSSRSVMAAKTRHFKWDVEYIHWSPDGEESVVMGINGQFPGPTIRAKAGDTVAVH  
LTNKLHTEGVVIHWHGIRQIGTPWADGTA AISQCAINPGETFLYRFKVDKAGTYFYHGHYGMQRSAGLYGSLIV  
EVGEGEKEPFHYDGEFNLLSDWWHKGSHEQEVDLSSNPLRWIGEPQTL LLN GRGQYNC SLAARFSKPPLPQC

KLRGGEQYAPQILRVRPNKIYRLRVASTTALGSLSLAIGGHKMVVVEADGNYVQPFVQDMDIYSGESYSVLFKT  
DQDPTKNYWISINVRGREPKTPQGLTLLNYLPNSASKFPTLPPIAPLWNDYNHKSFSNKFALMGSPKPPQ  
NHRRILLNTQNKIDGYTKWAINNVSLVLTQLYLGSIYGINAFDTKPPDPNFPKDYDLKQAPNSNSTYGNV  
YMLKFNTTIDILQANALAKDVSEIHPWHLHGDFWVLGYGEGKFSEKDVKKFNLKNPPLRNTAVIFPFGWTA  
LRFVTDNPGVWAFHCHIEPHLMGMGVIFAEGVHLVKKIPKEALACGLTGKMLMSNKH

>NtAAO2

MGSGKVTFVALLCLSVGIAEDPYLYFNWNVTYGTIAPLGVPQQGILINGQFPGPRINCTSNNNIVNVFN  
DEPFLFTWNGVQHRKNSWQDGTGTMCPIMPGQNFTYRFQVKDQIGSYSYFPTTALHRAAGGYGALNVHS  
RALIPVPFDNPADEYNVFGDWYNGHKHTLKKILDGGRTIGRPDGIINGKSAKVGEAKEPLFTMEAGKTYRYF  
CNLGMRSSVNIRFQGHMVKLVEGSHTVQNIYDSLHLVHGQCLSVLVTADQEPKDYLLVSSRFLKQALSSVAI  
IRYANGKGPASPELTPPPENTEGIAWSMNQFRSFRWNLTASAARPNPQGSYHYGQINITRTIKIFNSMSQVGG  
KLRYGLNGISHTNGETPLKLVYFGATNKAFKYDLMADEAPADPSKLTATNVKNATYRNFVEIIFENHEKTIRTYH  
LDGYSFFAVAVEPGRWSPEKRKNYNLVDGLSRNNIQVYPNSWAAIMLTFDNAGMWNLRSEMWEKTYLGEQL  
YFSVLSPSRSLRDEYNIPDNHPLCGIVKGLSMPAPYKA

>GmAAO1

MVELRLSIRALQLPTLLILCFFLILGNFHKAEARIRHHKWEVKYEFRSPDCFKKLVITINGKTPGPTIQAQEGDTIVV  
QVNNSLVTENLSIHWHGIRQIGTPWFDGTEGVTQCPILPGDTFIYQFVVDRPGTYLYHAHYGMQREAGLYGMI  
RVAPRDPEPFAYDLDRSILNDWYHKSTYEQAAGLSSIPFQWVGEPQSLLIHGKGRFNCSKSPSVSTDVCDTSNP  
QCSPFVQTVIPGKTYRLRIASLTALSALSFEIANDMTVVEADGHYVEPFVKNLFIYSGETYSVLVKTDQDPSRN  
YWITSNVVSRNRTPPGLGMFNYPNHPKRSPTVPPSPPAWDDVEPRLAQSLIKARQGYILKPPTTS DRVIVL  
LNTQNNISEYRHWSVNNVSFTLPHTPYLISLKENITGAFDTPPPDGYDFANYDIFSVASNANATSSSGIYRLKFN  
TTVDIILQNANTMNKNNSETHPWHLHGDFWVLGYGKGKFDVNNDTKKYNLENPIMKNTVPVHPFGWTAL  
RFRDTPNPGVWAFHCHIESHFYMGMGVVFEEGIERVGKLPSSIMGCGQTRGFHRP

>GmAAO2

MVELGLISLALQLPRLLILCFFVILGNFHKAEARIRHYKWEAKYEFRSPDCFKKLVITINGKTPGPSIQAQEGDTII  
VQVNNSLVTENLSIHWHGIRQIGTPWFDGTEGVTQCPILPGDTFIYQFVVDRPGTYLYHAHYGIQREAGLYGM  
MRVAPRDPEPFAYDLDRSILNDWYHSSTYEQAAGLSSIPFRWVGEPQSLLIHGKGIFNCSKSPSLGTDVCDASK  
CSPFVQTVIPGKTYRLRIASLTALSALSFIQIEGHNMVVEADGHYVEPFVKNLFIYSGETYSVTVKSDQDPSRNY  
WITSNVVSRNRSTPAGLGMFNYPNHPKRSPTVPPSPPAWHDVEPRLAQSFISIKARQGYIHKPPTTS DRVIVL  
LNTQNNISEYRHWSVNNVSFTLPHTPYLIALKENINGAFDSTPPPDGYDFANYDIFSVASNANATSSSGIYRLKFN  
TTVDIILQNANTMTKTNSETHPWHLHGDFWVLGYGKGKFDVNNDTKKYNLENPIMKNTVPVHPFGWTALR  
FRDTPNPGVWAFHCHIESHFYMGMGVVFEEGVERVGKLPSSIMGCGQTRGFHGP

>GmAAO3

MVTMGLKALFVWCIIWLAFQSLGGRVRHYKFDVEYMIRKPCLEHVVMGINGQFPGPTIRAEGDILDIAL  
TNKLFTEGTVIHWHGIRQVGTPWADGTAAISQCAINPGETFYRFTVDRPGTYFYHGHGMQRSAGLYGSLIV  
DLPKGQNEFPFYDGEFNLLSDWLWHTSSHEQEVGLSSKPFKWIGEAQTLLINGRGQFNCSLASKFINTTLPQCQL  
KGGEECAPQILHVEPNKTYRIRIASTTALASLNLAISNHKLVVVEADGNYVTPFAVDDIDIYSGESYSVLLRTDQDP  
NKNYWLSIGVRGRKPNTPQGLTILNYKPISASVFPTFPPPIPLWNDFERSKAFTKKIIAKMGTPQPPKRS DRTIFL  
LNTQNRVDGFTKWAINNVSLTLPPTPYLGSIKFKIKNAFDKTPPPVTFPQDYDIFNPPVNPNASIGNGVYMFNL  
NEVVVDVILQANQLSGSGSEIHPWHLHGDFWVLGYGEGKFKSGDEKKFNLTHAPLRNTAVIFPYGWTALRFK

ADNPGVWAFHCHIEPHLMGMGVIFAEAVQKVGKIPRDALTCGLTGKMLGNRHY

>GmAAO4

MSKSNNNIMSFKALTWCILLSLLQLSLGAVRHRIRFNVEYMYREPCHEHVVMGINGQFPGPTITAEAGDTLEI  
LLTNKLSTEGTVIHHWGIRQYGTPWADGTAAISQCAIAPGETFNYTFTVDRPGTYFYHGHFGMQRAAGLYGSLI  
VNLPGKKKEPFHYDGEFNLLSDWWHKSTHSQEVGLSSMPFRWINEPQSLLINGRGQYNCSLAASLIKTSPLQ  
CKFRGNEQCAPQILHVDPNKTYRIRIASTTSLASLNLAI GDHKL VVVEADGNYVKPFIVDDIDIYSGESYSVLLTTN  
QDPKKNYWISVGVRRPPNTPQGTLILNYKTISASVFPTSPPPITPQWDDYNRSKAFYKILALKGTEQPPQHYD  
RRLFLNTQNLVDGYTKWAINNVSLALPTTPYLGSI RFNVNGAFDPKSPDNFSMDYDILKPPLNPNKIGSGVY  
MFQFNQVVDVILQANANVMKGKNSEIHPWHLHGHD FWILGYGDGKFKQGDDSKFNLKNPPLRNTAVIFPHG  
WTALRFKADNPGVWAFHCHIEPHLMGMGVIFAEAVQNVSTIPRDAFACGILKKFLNKEHN

>GmAAO5

MGLKALFVWCIIWLGLAHLSLGGRVRHYKFDVEYMIRKPCLEHVVMGINGQFPGPTIRA EVGDILDIALTNKL  
FTEGTVIHHWGIRQVGTWPADGTAAISQCAINPGEAFHYRFTVDRPGTYFYHGHGMQRSAGLYGSLIVDLPK  
GQNEPFHYDGEFNLLSDLWHTSSHEQEVLSSKPFKWIGEPQTLLINGKGQFNCSLASKFINTTLPQCQLKGG  
EECAPQILHVEPNKTYRIRIASTTALASLNLAINHKL VVVEADGNYVSPFAVDDIDIYSGESYSVLLRTDQDPNKN  
YWLSIGVRRRAPNTPQGTLILNYKPISASIFPSPPPITPIW NDFERSKAFTKKIIAKMGTPQPPKRSRDTIFLLNT  
QNLLDGFTKWAINNVSLTLPPTPYLGSIKFKINNAFDKTPPPVTFPQDYDIFNPPVNPNTTIGNGVYMFNLNEV  
VDVILQANANQLSGSGSEIHPWHLHGHD FWVLGYGEGKFKPSDEKKFNLTHAPLRNTAVIFPYGWTALRFKADN  
PGVWAFHCHIEPHLMGMGVIFAEVGHKVGKIPRDALTCGLTGKMLGNRHY

>GmAAO6

MSLKALFVGCIIWLGLVELSIGGIVRHYKFDVEYMIRKPCLEHVL MGINGQFPGPTIRA EVGDILDIALTNKLFTE  
GTVIHHWGIRQVGTWPADGTASISQCAINPGETFHYKFTVDRPGTYFYHGHGMQRAAGLYGSLIVDLPKGQ  
NEPFHYDGEFNLLFSDLWHTSSHEQEVLSTKPLKWIGEPQTLLINGRGQFNCSLASKFINTTLPQCQFKGGEEC  
APQILHVEPNKTYRIRIASTTSLAALNLAINHKL VVVEADGNYVTPFAVDDVDIYSGESYSVLLRTDQDPNKNY  
WLSIGVGRKPSTSQGLTILNYKTISASIFPTSPPPITPLW NDFEHSKAFTKKIIAKMGTPQPPKLYDRRVLLNTQ  
NRVDGFTKWSINNVSLTLPPTPYLGSIKFKINNAFDQTPPPMNFQDYDIFNPPVNP NATIGNGVYMFNLNEV  
VDVILQNSNQLSVNGSEIHPWHLHGHD FWVLGYGEGKFKLGDEKKFNLTHAPLRNTAVIFPYGWTALRFKADN  
PGVWAFHCHIEPHLMGMGVIFAEVGHKVGKIPREALTCGLTGKKLVENGHY

>GmAAO7

MSLKALFVWCIIWLGLVELSLGGRVRHYKFDVEYMIRKPCLEHVVMGINGQFPGPTIRA EVGDILDIALTNKLF  
SEGTVVHWHGIRQVGTWPADGTASISQCAINPGETYHYRFTVDRPGTYFYHGHYGMQRAAGLDKTNRFHYD  
GEFNLLSDLWHTSSHEQEVLSTKPLKWIGEPQTLLINGRGQFNCSLASKFINTTLPQCHLKGDEECAPQILDV  
EPNKTYRIRIASTTSLAALNLAINHKL VVVEVDGNYVTPFAVDDMDIYSGESYSVLLHTNQNPKNYWLSIGVR  
GRKPNTPQGLAILNYKTISALIFPTSPPPITPLW NDFEHSKAFTKKIIAKMGTPQPPEHSDRTQYSSSTPKIELMDY  
HIFNPPVNP NATIGNGVYMFNLNEVVDVILQANANQLIGNGSEIHPWHLHGHD FWVLGYGEGKFKSGDVKKF  
NFTQAPLRNTAVIFPYGWTALRFKADNPGVWAFHCHIEPHLMGMGVVFAEGVGHKVGKIPREALTCGLTGKKL  
IENGRY

>ZmAAO1

TGITAPLESRHIAAACLCTRAQSGTPISHIIGSSSCAAPHCVD PAMGCPPRLCCLFLSLA AVVARAATRHQEW

EISYQFKSPDCVRKLAVTINGETPGPTIRATQGDTVVRVKNSSLTENVAIHHWGIRQRGTPWADGTEGVTQCP  
ILPGDTFTYAFVVDPRPGTYMYHAHYGMQRSAGLNLIVVAAAPGGPDAEPFRYDGEHDVLLNDWWHKSTYE  
QAAGLASAPLVWVGEPQSLLINGRGRFVNCSAAGACDAAHPECATPVFAVVPGRTYRFRIASVTSLSALNFEIE  
GHEMTVVEADGHYVKPFVVKNLNIYSGETYSVLIKADQDPNRNYWLASNVVSREPGETAGTAVLSYGGRSSP  
RRSPPTAPPAGPAWNDTAYRFRQSVATVAHPAHVEPPPPRADRTILLNTQNKIDAHIKWALNGVSFTLPHTPYL  
VAMKRPGLLDTFDQRPPPETYAHRGYDVYAVPPNPNTTSDGLYRLRFGSVVDVVLQANANMLAPNKSETHP  
WHLHGHDFWVLGYGIGRFDPAVHPASYNLRDPILKNTVAVHPYGTALRFRADNPGVWAFHCHIESHFFMG  
MGIAFEEGVDRVAPLPPQIMGCGKTRGGH

>ZmAAO2

MALLPGAARRLLCSLFLCLWLSTLARAATRRYEWEVSQFKSPDCVRKLSATINGQTPGPTIRATQGDTVVEVKVR  
NSLLTENLAIHHWGIRQIGTPWADGTEGVTQCPILPGDTLTYAFVVDPRPGTYMYHAHYGMQRSAGLYGVVVV  
VVAAPGAKADDAEPFAYDDEHHVLLNDWWHNSYELAVGLASVPMVWVGEPHSLINGRGRFNCSSAAV  
PGTCNATSPECPTPVFAVVPQGTYRFRIASVTSLSALNFEIEGHEMTVVEADGHYVKPFVVKNLNIYSGETYSVLI  
KADQDPNRNYWLASNVVSRQPATPTGTAILSYSGDRAPPSTTPPTGPAWNDTMYRFQQSVATVAHPAYVEPP  
PPRADRTILLNTQNKIDAHTKWALNGVSFTLPHTPYLVAMKRGLLDTFDQRPPPETYAYQGYDVYAPPQNPNA  
TTSDGLYRLRFGSVVDVVLQANANMLAPNKSETHPWHLHGHDFWVLGYGIGRFDPAVHPASYNLKDPLKNTV  
AVHPYGTALRFKADNPGVWAFHCHIEAHFFMGMGIVFEEGIQRVASLPPEIMGCGETNGGHR

>ZmAAO3

ARRSFSSRSLTMSAPRQPLCKLATAVHLLCSLAALSVSADAKVHHHTWDIAYHYKSLDCVNKLAVTINGESP  
GPTIRATQGDTVVTNRNSLETENTGIHWHGIRQVGSPPWADGTGVTQCPILPGDTFTYRFVVDPRPGTYFYHA  
HYGMQRVAGLDGMLVSVDPDGAEPFAYDEDRTVLLMDWWHKSVEQAVGLASDPLVFGEPQSLLINGRG  
VFEPFHCSRAPSASGCSSAPRPAAGCAPPALFTAVPGKTYRLRVGSLTSLALNARERNTTSAMAILSYAGNDPR  
APPPTPRPEGPAWDDARPRLEQSRSLAVAHPDHVVPVPPRPDRALLLNTQNRIGGHIRWAINGVSLAFPATPY  
LVSIGRGLRGAYDDQRPPPDYDYSYDIASPPTANGTVASKVYRLALGSVVDVVLQNTVALNNKSETHPWHLH  
GHDFWVLAYGDDGKKFDPERDTNKFNLRDPMKNTVALHPRGWTAVRFVADNPGVWLFHCHIEAHVYMG  
MGLVFEEGVDKVGRLPKSIMGCGRSRT

>ZmAAO4

MRLPLPLLALVCCALMARQHCAAAGKARHLRWEISNMFWSPDCEEKVVIGINGQFPGPTIRARAGDTVHVQL  
RNALHTEGVVIHWHGIRQIGTPWADGTAAISQCAINPEETFTYRFVVDKPGTYFYHGHYGMQRAAGLYGSLV  
DVAEEEEPFQYDGELNLLSDWYHESIHTQMVALSSRPFRWIGEPQSLLINGRGQFNCSLAAAHQTGATNTQ  
CAATAANTQCAPVVLVQPNKTYRLRVASTTSLASLNLAINHKLTVVEADGNYVDPFVDDIDLYSGDSYSVLL  
TTDQDTSSNYWVSVGVRGRLPKTAPALAVLNYPNRASDLPALAPPVTPAWDDYGHSAFTYRIRARAGTPPP  
PPTAARRIELLNTQNRMDGRIRWSINNVSMVLPATPYLGSLKMLKSTLAAARPAETFSREYDVTLPNPNNTT  
AGDNVYVLAHNTTVDVLLQANALSARNVSEVHPWHLHGHDFWVLGYGDGAYRGDAADearLNLRDPPLRN  
TAVIFPYGTMLRFVADNPGVWAFHCHIEPHLMGMGVIFAEAVDLVAKVPNEAVSCGATATMAGGHL

>TaAAO1

MSGGGAAMESSLLCAKQLLLCCLFLFLWALAAVAEAKTVHEQWDISYQFTHSDCVRKLAVTINGGTPGPTIRAV  
QGDTVVTVKNLLMTENVAIHHWGIRQLGTPWADGTEGVTQCPILPGDTFEYRFVVDPRPGTYMYHAHYGM  
QRSAGLNGMIVVAAAPGSADAEPFAYDGGHEVLLNDWWHKSTYEQAAGLAAVPIVWVGEPQSLLINGRGR  
YNCSAMASDAAAACNATHPECAPQVFAVVPGRTYRFRIASVTSLSALNFEIEGHEMTVVETDGHYVKPFVVK

LNVSGETYSVLKADQDPNRNYWLASNVVSRKPGTPTGTAVLSYYGGRSSPRAPPPTAPPAGPAWNDSAYRIN  
QSLATVAHPEHAHPPPPRADRTILLNSQNKIDGRIKWAINNVSFTLPHTPYLVALKHGLLGAFDQRPPPETYNH  
TGYDVYGVQANPNATTS DGLYRLAFGSVVDVVLQANMLAPNNSETHPWHLHGHDFTWLGFGVGRFDP  
HPATYNLRDPMKNTVAVHPFGWTALRFRADNPGVWAFHCHIEAHFFMGMGVAFEEGIERVGDLP EEIRRC  
VSTKGGGH

>TaAAO2

MLPSARPLAAAAVLCFWLLVAVAEAKVHHYTWDISYQLKSPDCFEKLAVTVNGEAPGPTIRATQGDTIVVAVH  
NKLETENTAIHWHGIRQIDTPWADGVAGVTQCPILGETFTYQFVVDPRPGTYLYHAHYGMQRVAGLNGMIVV  
TVPDGFVEPFYSYDEEHTVLLGDWWHKSVEYEQATGLSSNPFFVTEPQSLLINGRGMFNCSLAPSGTCNASRPD  
CALPTLFTAVPGKTYLLRIGSLTSLSSLYFEIEGHSMMVVEADGHYVLPFAVRGLFIYSGETYSVLVKADQDPRRNY  
WAASHVVGRNPSQTPSGKAVVSYAFNGNNPWMPPTAPPAGRAWNNTAIRVEQSRAIFAHPRYVVPMPAR  
ADRTLLLLNTQNRIDGHIKWTINGVSLMFPATPYLVAMKRGMKDAYEQRPPPD MYDHMSHEISAPAPTNGTV  
GSPVYRLALGSVVDVVLQNSNALNNKTETHPWHLHGHDFTWVLGHGEGKFNPAAAWRLLNVRDPIMKNTV  
PLHPDGWTAVRFRADNPGVWLFHCHVEAHVFMGMGVVFEEGVKRVGRLPSSIMGCGRSKGLH

>TaAAO3

MESSLLGAKQLLLCCLFLLWVLAVAEAKTVHEQWEISYQFTHSDCVRKLAVTINGGTPGPTIRAVQGDTVVVT  
VKNLLMTENVAIHWGIRQLGTPWADGTEGVTQCPILPGDTFEYRFVVDPRPGTYMYHAHYGMQRSAGLNG  
MIVVAAAPGGADAEPFAYDGG EHDVLLNDWWHKSTYEQAAGLAAPVWVWVGE PQSLLINGRGRYNC SAMA  
PDAAACNATHPECAAQVFAVVPGRTYRFRIASVTSLSALNFEIEGHEMTVVETDGHYVKPFVVKLNLIYSGETYS  
VLKADQDPNRNYWLASNVVSRKPGTPTGTAVLSYYGGRSSPRAPPPTAPPAGPAWNDSAYRIGQSLATVAHP  
EHAHPPPPRADRTILLNSQNKIDGRIKWAINNVSFTLPHTPYLVALKHGLLGDFDQRPPPETYNHTGYDVYGV  
QANPNATTS DGLYRLAFGSVVDVVLQANMLAPNNSETHPWHLHGHDFTWLG YGVGRFDP AVHPATYNLR  
DPVMKNTVAVHPFGWTALRFRADNPGVWAFHCHIEAHFFMGMGVAFEEGIERVGDLP EEIRRCVSTKGGGH

>TaAAO4

MLPSARPLAAAAVLCFWLLVAVAEAKVHHYTWDISYQLKSPDCFEKLAVTVNGEAPGPTIRATLGDTIIVAVHN  
KLETENTAIHWHGIRQIDTPWADGVAGVTQCPILGETFTYKFVVDPRPGTYLYHAHYGMQRVAGLNGMIVVT  
VPDGFVEPFYSYDEEHTVLLGDWWHKSVEYEQATGLSSNPFFVTEPQSLLINGRGMFNCSLAPSGTCNASRPDC  
ALPTLFTAVPGKTYLLRIGSLTSLSSLYFEIEGHSMMVVEADGHYVRPFAVRGLFIYSGETYSVLVKADQDPRRNY  
WAASHVVGRNPSQTPTGKAVVSYAFNGNNPWMPPTAPPAGPPWNNTAIRVEQSRAIFAHPRFVEPMPAR  
ADRTLLLLNTQNRIDGHIKWTINGVSLMFPATPYLVAMKRGMKDAYEQRPPPD MYDHMSHDISAPAPTNGTV  
GSPVYRLALGSVVDVVLQNSNMLNNKSETHPWHLHGHDFTWVLGHGEGKFNPAAAWRLLNVRDPIMKNT  
VPLHPDGWTAVRFRADNPGVWLFHCHVEAHVFMGMGVVFEEGVERVGRLPSSIMGCGRSKGLH

>TaAAO5

MRGGGAMESLLGANPRLLCCLFLLWALA VA EAKTVHKQWDISYQFTHSDCVRKLAVTINGRTPGPTIRAVQ  
GDTVVVTVKNLLMTENVAIHWGIRQLGTPWADGTEGVTQCPILPGDAFEYRFVVDPRPGTYMYHAHYGMQ  
RSAGLNGMIVVAAAPGSADAEPFAYDGG EHEVLLNDWWHKSTYEQAAGLAAPVWVWVGE PQSLLINGRGRY  
NCSAMAPDAACNATHPECAAQVFAVVPGRTYRFRIASVTSLSALNFEIEGHEMTVVETDGHYVKPFVVKLNLI  
YSGETYSVLKADQDPNRNYWLASNVVSRKPGTPTGTAVLSYYGGRSSPRAPPPTAPPAGPAWNDSAYRIRQSL  
ATVAHPEHAHPPPPRADRTILLNSQNKIDGRIKWAINNVSFTLPHTPYLVALKHGLLGAFDQC P P PETYNHTGY  
DVYGVQANPNATTS DGLYRLAFGSVVDVVLQANMLAPNNSETHPWHLHGHDFTWLG YGVGRFDP AVHPA

TYNLRDPVMKNTVAVHPFGWTALRFRADNPGVWAFHCHIEAHFFMGMGVAFEEGIERVGDLP EEIRRCVSTK  
GGHH

>TaAAO6

MLPSARPLLAPAAAVLCFWLLVAVAEAKVHHYKWDISYQLKSPDCFEKLAVTVNGEAPGPTIRATLGDTIVVDV  
HNKLETENTAIHWHGIRQIGTPWADGVAGVTQCPILPGETFTYKFVIDRPGTYLYHAHYGMQRVAGLNGMIV  
VTVPEGFVEPFYSYDEEHTVLLGDWWHKSVEYEQATGLSANPFVFTPEQSLLINGRGMFNCSLAPSGTCNASRP  
DCALPTLFTAVPGKTYLLRIGSLTSLSSLYFEIEGHPMMVVEADGHYVRPFAVRGLFIYSGETYSVLVKADQDPRR  
NYWAASHVVGRNPSQTPSGKAVVSYAFNGNNPWMPPTAPPAGPPWNNTAIRVDQSRAIFAHPHFVEPMP  
ARADRTLFLNTQNRIDGHIKWTINGVSLMFPATPYLVAMKRGMKDAYEQRPPPDMDHMSHDISAPAPTNG  
TVGSPVYRLALGSVVDVVLQNSNMLNNKSETHPWHLHGHDFFWVLGYGEGKFNPAADAWRLLNVRDPIMKN  
TVPLHPDGWTAVRFRADNPGVWLFHCHVEAHVFMGMGVVFEEGVERVGRLPSSIMGCGRSKGLH

>TaAAO7

MTRPHTGSEPPLVMHLLLCCTFLLAFAAPATTAASAPAPAPTPAKQTM TW DVEYIMWAPDCQQRVMIGINGK  
FPGPNITARAGETLSITVNNKLHTEGLVIHWHGMRQVGTWPADGTASISQCAVSPGDSFTYEFVADKPGTYFY  
HGHFGMQRAAGLYGWLVDATAERGEYPRRDYDGGELRMLLSDWYHDNVYAQAAGLEQKYDHFQWVGEP  
QTILVNGRGQYDCMLGAVTRFHRGIDRRARTCVRGKEAKLCGDEERCLRRSECGPYCPESQCAPVLDVEPGR  
TYRLRIASTTSLAALNVQVQGHELTSVEADGNPVEPFTVADIDIYSGESYSVLLTNTHTPTFYRSGSFVWSVGVR  
GRPPKTLPATAVLRYTNSRFPWPGSPPPATPAWYDLQRSKDFARRIKARRNAAEAPPPPRTEQVSRRIVM LNTQ  
TLVDGHIKWAVNNVSLTLPPTPYLGAYFYGVQGSAFDASGEAPNGFPGGYDIDLPPENNSYEATLSDRVYELAH  
GAVVDVVLQNADMRRDNDSETHPWHLHGHDFFWVLGYGEGRYTGGERLNTEDPPLRNTVVVFPHGWTAIRF  
VADNVGAWAFHCHIEPHLMGMGAVFVEGAHMIRELDVPREAMMCGVIRTTVAALTPAKPGSPAPAP

>TaAAO8

MRALFAWCALLACGGLLHCAEAAKARHLKWEVGHMFWSPDCEEKVLIGINGQFPGPTIRAKAGDTIVVELK  
NGLHTEGVVIHWHGVRQIGTPWADGTAAISQCAINPEETFTYRFVVDKPGTYFYHGHYGMQRAAGLYGSLIV  
DVADGEEEPFKYDGELNLLSDWYHDSIYNQMVGLSSSPMRWIGEPQSLLINGRGQFNCSLAAAHTPGTKQC  
TAGGNRHCAVILPVQPNKTYRLRIASTTSLASLNLAIGNHKLTVVEADGNYVEPFVDDMDIYSVTPAWNDA  
HSAFTTQIKARAGTPPPATSDRRIELLNTQNKLDGHIKWSINNVSLVLPATPYLGSLKLGLKTALAAARPADTFG  
RAYDVTRPPHPNNTTTGDNVYVLRHNTTVDVVLQANALQHNVSEVHPWHLHGHDFFWVLGYGEGAYRGD  
AADAARLNLANPPLRNTAVIFPYGWTALRFVADNPGVWAFHCHIEPHLMGMGVIFAEADRVGKVPKEAVS  
CGATATALMNGDHL

>TaAAO9

MRALFAWCALLACAGVMHCTEAAKARHLKWEVSHMFWSPDCEEKVLIGINGQFPGPTIRAKAGDTIVVELK  
NGLHTEGVVIHWHGVRQIGTPWADGTAAISQCAINPEETFTYRFVVDKPGTYFYHGHYGMQRAAGLYGSLIV  
DVADGEEEPFKYDGELNLLSDWYHDSIYNQMVGLSSSPMRWIGEPQSLLINGRGQFNCSLAAAHTPGTKQC  
TAGGNRHCAVILPVEPNKTYRLRIASTTSLASLNLAIGNHKLTVVEADGNYVEPFVDDMDIYSGDSYSVLLTT  
DQDPSSNYWVSIGVRGRTPKTAPALALLNYPNRGFKLPAIAPPVTPLWNDAHSAFTTHIKARAGTPPPATSD  
RRIELLNTQNKLDGHIKWSINNVSMVLPATPYLGSLKLGLKTALTAARPADTFGRAYDVTRPPHPNNTTTGDN  
VYVLRYNNTTVDVVLQANALQHNVSEVHPWHLHGHDFFWVLGYGEGAYRGDAADAARLNLVNPPLRNTAVIF  
PYGWTALRFVADNPGVWAFHCHIEPHLMGMGVIFAEADRVGKVPKEAVSCGATATALMNGDHL

>TaAAO10

MTRPHTGSESPLVHLLCCTFLLAAAAPATTAASVPAPAPTPTKQNMWTDVEYIMWSPDCQQRVMIGINGK  
FPGPNITARAGETLSITVNNKLHTEGLVIHWHGMRQVGTWPADGTASISQCAISPGDSFTYEFVADKPGTYFYH  
GHFGMQRAAGLYGWLNVNATAEQDEPYRRDYDGGELRMLLSDWYHDNVYAQAAGLEQKYDHFQWVGEPQ  
TILINGRGQHDCMLGTVTRFHRGIDRHAKTCVRDKQAKLCRDEERCLRRSECGPYCPQSQCYPVVDVEPGRT  
YRLRIASTTSLALNVQVQGHDLTVVEADGNPVEPFTVPDIDIYSGESYSVLLTTNHTPTFYRSGSFVSVGVGRG  
RPPKTLPATAVLRYTNSRFPWPGSPPPATPAWYDLQRSKGFTYRIKARRNAAEAPPPRTEQVNRTIVMLNTQTL  
VGGHMKWAVNNVSLTPATPYLGAYFYGVQGSADFASGEAPNGFPGGYDIDLPPANNSEATLSDRVYELPHG  
AVVDVVLQNADMRRDNDSETHPWHLHGHDWFVLGYGEGRYGGGGGGERLNTEDPPLRNTVVLFPHGWTA  
IRFVADNVGAWAFHCHIEPHLMGMGAVFVEGAHMIRELDVPRETMMCGVIRTAAASLTAPKPGSPAPSAH  
G

>TaAAO11

MRALFAWCALLACGGVMHCAEAAKARHLKWEVSHMFWSPDCEEKVLIGINGQFPGPTIRAKAGDTIVVELK  
NGLHTEGVVIHWHGVRQIGTPWADGTAAISQCAINPEETFTYRFVVDKPGTYFYHGHYGMQRAAGLYGSLIV  
DVADGEEEPFKYDGEINLLSDWYHESIYNQMVGLS SSPMRWIGEPQSLLINGRGQFNCSLAAAHPTGKQCT  
AGGNRHCAVPILPEPNKTYRLRIASTTSLASNLAIKGHKLTVEADGNYVAPFVDDMDIYSGDSYSVLLTTD  
QDPSSNYWVSIGVRGRTPKTAPALALLNYRPNRGFKLPAIAPPVTPAWNDTAHSAFTTQIKARAGTPPPATS  
DRRIELLNTQNKLDGHIKWSINNVSLVLPATPYLGS LKGLKTALAAARPADTFGRAYDVTRPPHNPNNTTGDNV  
YVLRHNTTVDVVLQNANALQHNSEVHPWHLHGHDWFVLGYGEGAYRGDAADAARLNLVNPLRNTAVIFP  
YGWALTALRFVADNPGVWAFHCHIEPHLMGMGVIFAEIDRVGKVPKEAVSCGATATALMNGDHL

>TaAAO12

MTRPHTSSSESPLMVHLLCCTFLLALAAPATTAASVPAPALTPAKQNMWTDVEYILWSPDCQQRVMIGINGKF  
PGPNITARAGETLSITVNNKLHTEGLVIHWHGMRQVGTWPADGTASISQCAISPGDSFTYEFVADKPGTYFYHG  
HFGMQRAAGLYGWLNVNATAEQDEPYRRDYDGGELRMLLSDWYHDNVYAQAAGLEQKYDHFQWVGEPQT  
ILINGRGQYDCMLGAVTRFHRGIDRRARTCVRGKEAKLCGDEERCLRRSECGPYCPQSQCAPVVDVEPGRTYR  
LRIASTTSLALNVQVQGHDLTVVEADGNPVEPFTVPDIDIYSGESYSVLLTTNHTPTFYRSGSFVSVGVGRPP  
KTLPATAILRYTNSRFPWPGSPPPATPAWYDLQRSKDFTHRINARRNAAEAPPPRTEQVNRTIVMLNTQTLVG  
GHMKWAVNNVSLTPATPYLGAYFYGVQGSADFASGEAPNGFPGGYDIDLPPANNSEYETLSDRVYELPHGAV  
VDVVLQNADMRRDNDSETHPWHLHGHDWFVLGYGEGRYTSGRERLNTEDPPLRNTVVVFPHGWTAIRFVA  
DNVGAWAFHCHIEPHLMGMGAVFVEGAHKIRELDVPREAMMCGVIRTAAALTPAKPGSSAPAPSAHR

>StAAO1

MSSSRLLLLLVFSLVGHSLAKTRHFKWEVGYIHWSTDGEESSVMGINGAFPGPTIRGRAGDIIVVELTNKLHT  
EGVVIHWHGIRQFGTPWADGTAAISQCAINAGETFVYRFKVDKAGTYFYHGHYGMQRSAGLYGSLIVDVAQG  
EREPFHYDGEFNLLSDWWHKGSHEQEVDLSSNPLRWIGEPQTLLINGRGQYNCSMAAQFSNPRLPQCKLRG  
GEQYAPQILVRPNKTYRLRLASTTALASNLAI GGHKMVVEADGNYVQPFVQDIDIYSGESYSILFTTDQDP  
SKNYWISTSVRGREP KTPQALTLLNYLPNSASKVPTLPPIAPLWNDYNHKSFSNKILALMGSPKPPIKNNRRIIL  
LNTQNKIDGYTKWAINNVSLVLPPTPYLGSIRYGINNAFDTRPPDPNFIDYDVMKQAPNSNATYNGGVYMLK  
MNNTIDIILQNANALGKGASEIHPWHLHGHDWFVLGYGEGKFSEKHVKFNLKNPPLRNTVVIYPYGTALRF  
VTDNPGVWAFHCHIEPHLMGMGVILAEGVHLVKNIPREALACGLTGKMLMTNKHN\*

>StAAO2



MSSLLGIFLYLFLLLSSISAKNREYKWRVEYMHWCPCDGVVISINGQFPGPTIRAIVGDTIFVHLTNNLPTEGL  
VIHWHGISQIGTPWADGAALISQCPINPGETFLYKFKVDKAGTYFYHGHYGMQRSAGLYGSLIVEDEKEAFHYD  
EEFNLLSDWVWHKSSHDQQIDLSSKPFWRWIGEPHTLLMNGRGQFNCSLAAQFSKLPITQCKLRGDEQYAPQIF  
KVHPSKTYRLRVASTTALASLNLAIEGHKMMVVEADGNYIQPFFVENMDIYSGESYSILFKTDQDPSNNYWISIS  
VRGREPKTPQGLTILNYIPNFASKIPNSPPPLAPLWNDYNYSKAFSNKIFGLMGLSPKPPTRQNNRILLNTQNRI  
EGYIRWSINNISLVFPTTPYLGSIKHGINNAFDTKSPNTFSKNYNIMKPPNPNSTYGNRIYMLKFNTTIDILQN  
ANALGENVSEIHPWHLHGHNFWVLGYGDGKFDHKKDVEKFNLKNPPLRNTVVIFPYGWTAIRFVANNPVGVW  
AFHCHIEPHLHLMGVVFAEGVHLVKNMPNEALNCGLTRKMFVKDKH\*

>StAAO3

MVEHNFHQIHSFVKLVIFLCLLFLSANISVEARIRHYEWEVKYKSPDCFKKLSISINGTTPGPTIVAQQGDTIV  
VEVKNSLLTENLAIHWHGIRQIGTPWADGTEGVTQCPVPGDTFVYKFVVDRAQTYLYHAHYGMQRQAGLQG  
MIRVSLPDGVLEPFSYDHDKSILLTDWYHKSTYEQATGLASLPFSWVGEPQSILIHGRGRFNCSIPSIDPTLCNAT  
NPQCTPYSMTTVVSGKTYRLRIGSLTALSALSFEIEGHNMVVEADGHYVEPFVVKNLFIYSGETYSVLKADQDPT  
RNYWASTKIVSRNSTTPNGLGIFNYYPNHPRRYPPSVPPSGPRWDDVAPRMAQSVAIKSHKDFIHAPPLTSDRV  
IVMLNTQNRVNGYVRWSVNNVSFNMHPHTPYLIALKHNLHTFEQTPPPDNYDHKNYDIFNIAPNVNATTSNSI  
YRLKFNTTVDIILQNANTMNLNNSETHPWHLHGHDWFVMGYGNGKFNQSIDPKNYNFVNPIMKNTIPVHPY  
GWTALRFRADNPGVWAFHCHIESHFFMGMGVVFEEGIEKVGKLPTSIMGCGESKRFLRP\*

>StAAO4

MSWICPADQLTPIRAYLDQKLDGEGMSEPNFKRRLKREFVIMNGRLNMNTNHQIVSRNLLVSMVKLQDLLLL  
LNKVTLLLLKYKNSLLTENLAIHWHGIRQIGTPWADGTEGVTQCPVPGDTFVYKFVVDRAQTYLYHAHYGMQR  
QAGLQGMIRVSLPDGVLEPFSYDHDKSILLTDWYHKSTYEQATGLASLPFSWVGEPQSILIHGRGRFNCSIPSIDP  
TLCNATNPQCTPYSMTTVVSGKTYRLRIGSLTALSALSFEIEGHNMVVEADGHYVEPFVVKNLFIYSGETYSVLK  
ADQDPTRNYWASTKVVSRRNTTPNGLGIFNYYPNHPRRYPPPTVPPPGPRWDDVTPRMAQSVAIKSHKDFIHA  
PPLTSDRVIVMLNTQNRVNGYVRWSVNNVSFNMHPHTPYLIALKHNLHTFEQTSPPDNYDHKNYDIFNIAPNV  
NATTSNSIYRLKFNTTVDIILQNANTMNLNNSETHPWHLHGHDWFVMGYGNGKFNQSIDPKNYNFVNPIMK  
NTIPVHPYGTALRFRADNPGVWAF HCHIESHFFMGMGVVFEEGIEKVGKLPTSIMGCGESKRFLRP\*

>StAAO5

MGNVALFHLCIGIFWVS SVVKAEDTYKYFTWTATYGTLSPLGVPQQVILINGQFPGPRDLVTNDNVILNLINK  
LDEPLLLTWNGIKQRKNSWQDGVLTNCPIPINSNYTYKFQTKDQIGSYTYFPSTQLHRAVGGFGALNVYARSVI  
SVPYAKPAGDFSLLIGDWYKSSHVLRQILDSSGRSLPYPNGLLINGQKQSTFSGDQGKTYMFRISNVGLKNSINF  
RIQGHKMRVVEVEGSHVLQNFYDSLVDVHVGQSM SVLTLTDQPPKDYYIVASTRFSRINFATSVLHYTNSQTPV  
SGPMPPAPAGQMHW SMLQARTFRWNLT SNAARP NPQGSFHYGKITISRTFVMANSAPLINGKLRYAVNSVS  
YVNPDTPLKLADHFNIPGVFNLSIQAYPSGGSPYLGTAVFPTSHHDFIEIVFQND EATMQSWHLDGYDFWVV  
GFGSDKWTQASRNKYNLVDALTRHTTQVYPKSWTAILVSLDNQGMWNLRSAMWDRQYLGQQVYLRVYDPT  
PSLANEYDIPTNALLCGKAAGRHT\*

>StAAO6

MGKLALLHLLCGILIFWAVSVIKAEDPYKYFTWTATYGMASLLGTPQQVILINGQFPGPRDLVTNDNIVLNLINK  
LDEPLLLTWNGIKQRKNSWQDGVLTNCPIPPNRNYIYKFQPKDQIGSYTYFPSTQLHRAAGGFGVLNVYARSV  
IPVPYAKPAGDFSLLIGDWYKTSKALRQILD SGKSLPFPDGLLINGQKQSTFTGDQGKTYMFRISNVGLKTTINF  
RIQGHKMKLVEVEGSHVIQNL YDSFDVHVGQSL SILVTLTDQSPKDYYIVASTRFTTTVLTSTSVLHYTNSQTPV

SGPVPAGPVNQFQWSLMQARTIRWNLTNSAARPNPQGSFHYGKITPSRTILLANSAPLINGKQRYAVNGISYIH  
PDTPLKLADHFNIPGVFTLDSIRSAPTADSPHLATAVLPSSLHEFLEIVFQNNEDTMQSWHLDGYDFWVVGFGS  
GTWTQASRKGYNLVDALTRHTTQVYPKSWTAIFVSLDNQGMWNLRSAMWDRQYLGQQAYLRVYNPTSSLA  
NEYDIPTNALLCGKADALRHP\*

>StAAO7

MHWCPDGDVGVDVISINGQFPGPTIRAIVGDTIFVHLTNNLPTEGLVIHWHGISQIGTPWADGAALISQCPINPG  
ETFLYKFKVDKTLLMNGRGQFNCSLAAQFSKLPITQCKLRGDEQYAPQIFKVHPSKTYRLRVASTTALASLNLAIE  
GHKMMVVEADGNYIQPFFVENMDIYSGESYSILFKTDQDPSNNYWISISVRGREPKTPQGLTILNYIPNFASKIP  
NSPPPLAPLWNDYNYSKAFSNKIFGLMGLSPKPPTQRNRRILLNTQNRIEGYIRWSINNISLVFPTTPYLGSIKH  
GINNAFDTKSPNFTSKNYNIMKPPNPNSTYGNRIYMLKFNTTIDIILQNANALGENVSEIHPWHLHGHNFV  
VLGYGDGKFDHKKDVEKFNLPPLRNTTVIFPYGWTAIRFVANNPGVWAFHCHIEPHLHLGMGVVFAEGVH  
LVKNMPNEALNCGLTRKMFVKDKH\*

>StAAO8

MGNVALFHLCIGIFWVS SVVKAEDTYKYFTWTATYGTLSPLGVPQQVILINGQFPGPRDLVTNDNVILNLINK  
LDEPLLLTWNGIKQRKNSWQDGVLTNCPIPINSNYTYKFQTKDQIGSYTYFPSTQLHRAVGGFGALNVYARSVI  
SVPYAKPAGDFSLLIGDWYKSSHKVLRQILD SGRSLPYPNGLLINGQKQSTFSGDQGKTYMFRISNVGLKNSINF  
RIQGHKMRVVEEGSHVLQNFYDSL DVHVGQSMSVLVTL DQPPKDYYIVASTRFSRINF TATSVLHYTNSQTPV  
SGMPMPAPAGQMHW SMLQARTFRWNLTNSAARPNPQGSFHYGKITISRTFVMANSAPLINGKLRYAVNSVS  
YVNPDTPLKLADHFNIPGVFNLSIQAYPSGGSPYLGTA VFPTSHHDFIEIVFQND EATMQSWHLDGYDFWV  
GYVITLQNISISPCYITVEIRSNPHLLLLICSFGSDKWTQASRNKYNLVDALTRHTTQVYPKSWTALVSLDNQGM  
WNLRSAMWDRQYLGQQVYLRVYDPTPSLANEYDIPTNALLCGKAAGRHT\*

>StAAO9

MGKLALLHLLCGILIFWAVSVIKAEDPYKYFTWTATYGMASLLGTPQQVILINGQFPGPRDLVTNDNVILNLINK  
LDEPLLLTWNGIKQRKNSWQDGVLTNCPIPPNRNYIYKFQPKDQIGSYTYFPSTQLHRAAGGFGVLNVYARSV  
IPVPYAKPAGDFSLLIGDWYKTSKALRQILDSGKSLPFPDGLLINGQKQSTFTGDQGKTYMFRISNVGLKTTINF  
RIQGHKMKLVEEGSHVIQNL YDSFDVHVGQSLSVLTL DQSPKDYYIVASTRFTTTVL TSTSVLHYTNSQTPVSG  
PVPAGPVNQFQWSLMQARTISNNKGSNYHENTSERWNLTNSAARPNPQGSFHYGKITPSRTILLANSAPLING  
KQRYAVNGISYIHPDTPLKLADHFNIPGVFTLDSIRSAPTADSPHLATAVLPSSLHEFLEIVFQNNEDTMQSWHLD  
GYDFWVVGFGSGTWTQASRKGYNLVDALTRHTTQVYPKSWTAIFVSLDNQGMWNLRSAMWDRQYLGQQA  
YLRVYNPTSSLANEYDIPTN ALLCGKADALRHP
