# Supplementary material for: Characterization and Identification of Drought-Responsive ABA-Aldehyde Oxidase (AAO) Genes in Potato (Solanum tuberosum L.)
Source: MDPI journal article supplement (doi:10.3390/plants12223809), 2023-11-09
Supplement: s1 [file s1]

**Table S2** The sequences of primers were used for *StAAOs* in qRT-PCR

| Gene          | Sequences                          |
|---------------|------------------------------------|
| <i>StAAO2</i> | F: 5'-CACCTTTGGCACCTCTTTGGAATG-3'  |
|               | R: 5'- CGAGTAGGAGGCTTAGGAGACAAC-3' |
| <i>StAAO4</i> | F: 5'-GCAAAGACAAGCAGGACTTCAAGG-3'  |
|               | R: 5'-AAGGCAAAGAAGCAAGACCAGTTG-3'  |
| <i>StAAO6</i> | F: 5'-CCACTGCTGATTCTCCACACCTAG-3'  |
|               | R: 5'-TCCGAAACCTACGACCCAGAAATC-3'  |
